# Supplementary material for: The Effects of a Meldonium Pre-Treatment on the Course of the LPS-Induced Sepsis in Rats
Source: MDPI journal article supplement (doi:10.3390/ijms23042395), 2022-02-21

**Principal Components Report**

Page/Date/Time 1 01-Dec-21 21:26:02  
Database

**Descriptive Statistics Section**

| Variables | Count | Mean     | Standard Deviation | Communality |
|-----------|-------|----------|--------------------|-------------|
| C1        | 18    | 64.05431 | 59.66594           | 1.000000    |
| C2        | 18    | 73.90549 | 66.80447           | 1.000000    |
| C3        | 18    | 89.0934  | 77.88059           | 1.000000    |

**Correlation Section**

| Variables | Variables<br>C1 | C2       | C3       |
|-----------|-----------------|----------|----------|
| C1        | 1.000000        | 0.997951 | 0.995938 |
| C2        | 0.997951        | 1.000000 | 0.996108 |
| C3        | 0.995938        | 0.996108 | 1.000000 |

Phi=0.996666 Log(Det|R)=-10.472501 Bartlett Test=158.83 DF=3 Prob=0.000000

**Bar Chart of Absolute Correlation Section**

| Variables | Variables<br>C1 | C2 | C3 |
|-----------|-----------------|----|----|
| C1        |                 |    |    |
| C2        |                 |    |    |
| C3        |                 |    |    |

Phi=0.996666 Log(Det|R)=-10.472501 Bartlett Test=158.83 DF=3 Prob=0.000000

**Eigenvalues**

| No. | Eigenvalue | Individual Percent | Cumulative Percent | Scree Plot |
|-----|------------|--------------------|--------------------|------------|
| 1   | 2.993331   | 99.78              | 99.78              |            |
| 2   | 0.004623   | 0.15               | 99.93              |            |
| 3   | 0.002045   | 0.07               | 100.00             |            |

**Eigenvectors**

| Variables | Factors<br>Factor1 | Factor2   | Factor3   |
|-----------|--------------------|-----------|-----------|
| C1        | -0.577458          | 0.434754  | 0.691037  |
| C2        | -0.577491          | 0.380798  | -0.722147 |
| C3        | -0.577102          | -0.816077 | 0.031171  |

## Principal Components Report

Page/Date/Time 2 01-Dec-21 21:26:02  
 Database

### Bar Chart of Absolute Eigenvectors

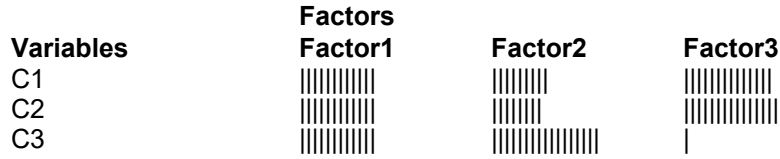

### Factor Loadings

| Variables | Factor1   | Factor2   | Factor3   |
|-----------|-----------|-----------|-----------|
| C1        | -0.999074 | 0.029561  | 0.031252  |
| C2        | -0.999131 | 0.025892  | -0.032659 |
| C3        | -0.998458 | -0.055489 | 0.001410  |

### Bar Chart of Absolute Factor Loadings

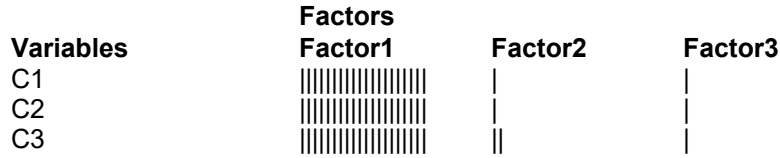

### Communalities

| Variables | Factor1  | Factor2  | Factor3  | Communality |
|-----------|----------|----------|----------|-------------|
| C1        | 0.998149 | 0.000874 | 0.000977 | 1.000000    |
| C2        | 0.998263 | 0.000670 | 0.001067 | 1.000000    |
| C3        | 0.996919 | 0.003079 | 0.000002 | 1.000000    |

### Bar Chart of Communalities

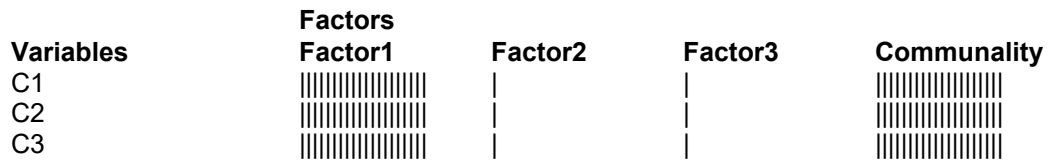

# Principal Components Report

Page/Date/Time 3 01-Dec-21 21:26:02  
Database

## Factor Structure Summary

|    | <b>Factor1</b> | <b>Factor2</b> | <b>Factor3</b> |
|----|----------------|----------------|----------------|
| C2 |                |                |                |
| C1 |                |                |                |
| C3 |                |                |                |

## Residual Section

| <b>Row</b> | <b>T2</b> | <b>T2 Prob</b> | <b>Q0</b> | <b>Q1</b> | <b>Q2</b> |
|------------|-----------|----------------|-----------|-----------|-----------|
| 1          | 1.22      | 0.7833         | 0.03      | 0.00      | 0.00      |
| 2          | .97       | 0.8342         | 2.70      | 0.00      | 0.00      |
| 3          | 7.41      | 0.1330         | 4.99      | 0.01      | 0.01*     |
| 4          | .84       | 0.8620         | 0.66      | 0.00      | 0.00      |
| 5          | .96       | 0.8382         | 2.24      | 0.00      | 0.00      |
| 6          | .90       | 0.8502         | 2.62      | 0.00      | 0.00      |
| 7          | 8.59      | 0.0967         | 14.40     | 0.01      | 0.01*     |
| 8          | 4.26      | 0.3259         | 0.86      | 0.01      | 0.00      |
| 9          | 1.32      | 0.7641         | 0.44      | 0.01      | 0.00      |
| 10         | 6.47      | 0.1724         | 8.34      | 0.01      | 0.00      |
| 11         | 1.19      | 0.7889         | 0.92      | 0.00      | 0.00      |
| 12         | 3.62      | 0.3936         | 1.83      | 0.01      | 0.00      |
| 13         | .53       | 0.9242         | 1.48      | 0.00      | 0.00      |
| 14         | .94       | 0.8412         | 1.34      | 0.00      | 0.00      |
| 15         | .96       | 0.8381         | 1.96      | 0.00      | 0.00      |
| 16         | 1.28      | 0.7707         | 2.50      | 0.00      | 0.00      |
| 17         | .69       | 0.8934         | 1.99      | 0.00      | 0.00      |
| 18         | 8.85      | 0.0903         | 1.73      | 0.03*     | 0.00      |

# Principal Components Report

Page/Date/Time 4 01-Dec-21 21:26:02  
 Database

## Factor Score

| Row | Factors |         |         |
|-----|---------|---------|---------|
|     | Factor1 | Factor2 | Factor3 |
| 1   | -0.0894 | -0.2148 | -1.0803 |
| 2   | 0.9498  | 0.1635  | 0.2149  |
| 3   | -1.2893 | 0.9377  | -2.2061 |
| 4   | 0.4677  | -0.6280 | -0.4770 |
| 5   | 0.8658  | 0.4519  | 0.0425  |
| 6   | 0.9356  | 0.1136  | 0.0989  |
| 7   | -2.1925 | 0.0245  | 1.9454  |
| 8   | -0.5300 | -1.6215 | 1.1617  |
| 9   | -0.3791 | -1.0821 | 0.0249  |
| 10  | -1.6677 | 1.6993  | -0.8968 |
| 11  | 0.5526  | 0.7091  | 0.6213  |
| 12  | -0.7790 | 0.9895  | 1.4259  |
| 13  | 0.7028  | 0.0848  | 0.1717  |
| 14  | 0.6678  | 0.0234  | 0.7034  |
| 15  | 0.8085  | 0.5327  | -0.1378 |
| 16  | 0.9129  | 0.5298  | -0.4105 |
| 17  | 0.8159  | -0.1295 | 0.0654  |
| 18  | -0.7523 | -2.5840 | -1.2675 |

## Plots Section

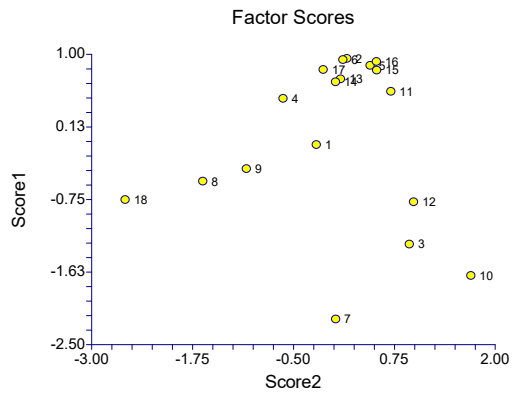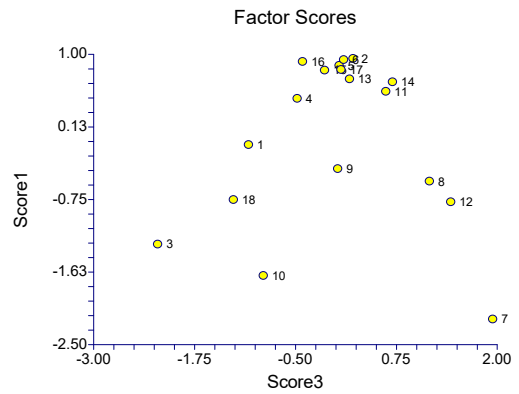

# Principal Components Report

Page/Date/Time 5 01-Dec-21 21:26:02  
Database

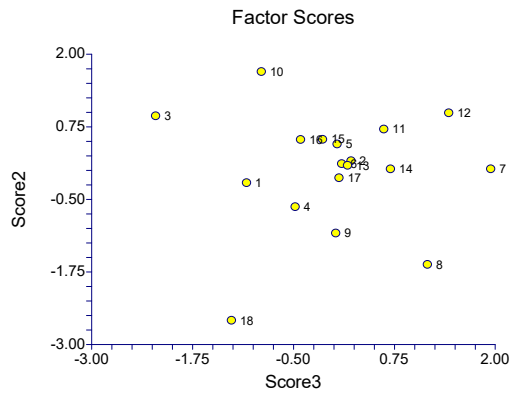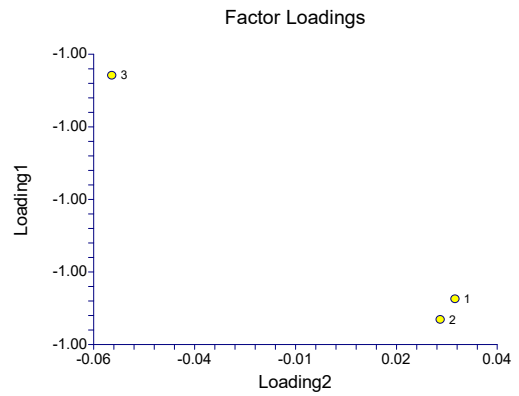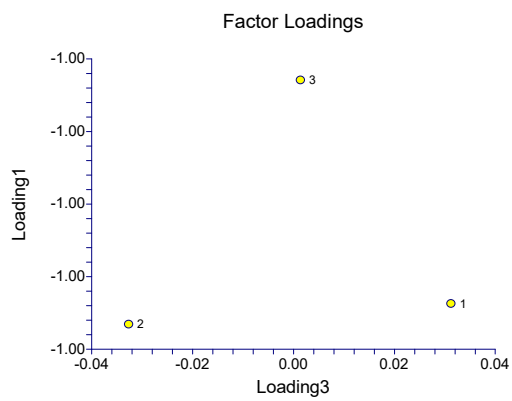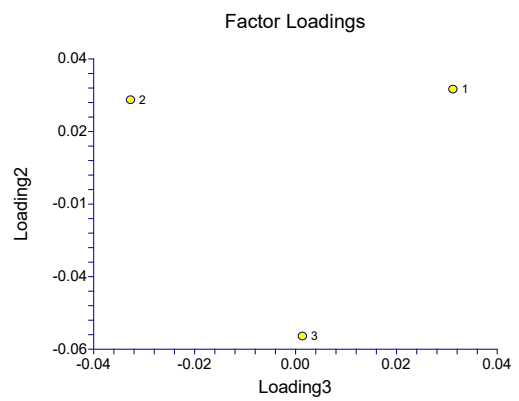

Supplement: s1 [file s1]
