# Supplementary material for: The Effects of a Meldonium Pre-Treatment on the Course of the LPS-Induced Sepsis in Rats
Source: MDPI journal article supplement (doi:10.3390/ijms23042395), 2022-02-21

**Principal Components Report**

Page/Date/Time 1 01-Dec-21 21:37:55  
 Database

**Descriptive Statistics Section**

| Variables | Count | Mean     | Standard Deviation | Communality |
|-----------|-------|----------|--------------------|-------------|
| C1        | 18    | 86.23236 | 72.95625           | 1.000000    |
| C2        | 18    | 83.49167 | 75.21184           | 1.000000    |
| C3        | 18    | 76.20348 | 73.70448           | 1.000000    |

**Correlation Section**

| Variables | Variables<br>C1 | C2       | C3       |
|-----------|-----------------|----------|----------|
| C1        | 1.000000        | 0.988327 | 0.987117 |
| C2        | 0.988327        | 1.000000 | 0.998203 |
| C3        | 0.987117        | 0.998203 | 1.000000 |

Phi=0.991228 Log(Det|R)=-9.396265 Bartlett Test=142.51 DF=3 Prob=0.000000

**Bar Chart of Absolute Correlation Section**

| Variables | Variables<br>C1 | C2 | C3 |
|-----------|-----------------|----|----|
| C1        |                 |    |    |
| C2        |                 |    |    |
| C3        |                 |    |    |

Phi=0.991228 Log(Det|R)=-9.396265 Bartlett Test=142.51 DF=3 Prob=0.000000

**Eigenvalues**

| No. | Eigenvalue | Individual Percent | Cumulative Percent | Scree Plot |
|-----|------------|--------------------|--------------------|------------|
| 1   | 2.982440   | 99.41              | 99.41              |            |
| 2   | 0.015798   | 0.53               | 99.94              |            |
| 3   | 0.001762   | 0.06               | 100.00             |            |

**Eigenvectors**

| Variables | Factors<br>Factor1 | Factor2   | Factor3   |
|-----------|--------------------|-----------|-----------|
| C1        | -0.575990          | -0.816434 | 0.040878  |
| C2        | -0.578146          | 0.371506  | -0.726450 |
| C3        | -0.577912          | 0.442062  | 0.686002  |

## Principal Components Report

Page/Date/Time 2 01-Dec-21 21:37:55  
 Database

### Bar Chart of Absolute Eigenvectors

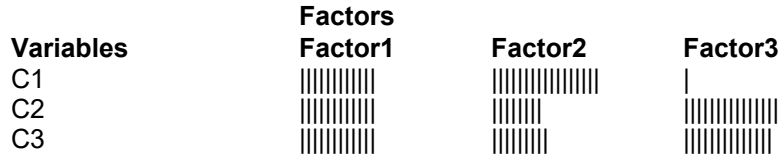

### Factor Loadings

| Variables | Factor1   | Factor2   | Factor3   |
|-----------|-----------|-----------|-----------|
| C1        | -0.994719 | -0.102618 | 0.001716  |
| C2        | -0.998444 | 0.046695  | -0.030496 |
| C3        | -0.998040 | 0.055563  | 0.028798  |

### Bar Chart of Absolute Factor Loadings

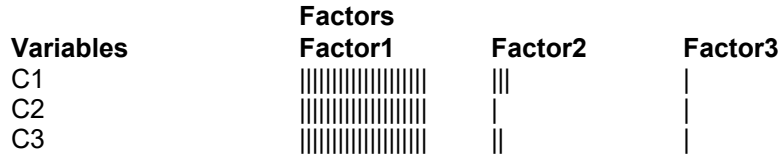

### Communalities

| Variables | Factor1  | Factor2  | Factor3  | Communality |
|-----------|----------|----------|----------|-------------|
| C1        | 0.989467 | 0.010531 | 0.000003 | 1.000000    |
| C2        | 0.996890 | 0.002180 | 0.000930 | 1.000000    |
| C3        | 0.996083 | 0.003087 | 0.000829 | 1.000000    |

### Bar Chart of Communalities

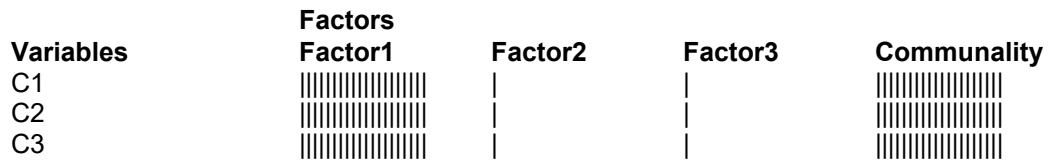

# Principal Components Report

Page/Date/Time 3 01-Dec-21 21:37:55  
Database

## Factor Structure Summary

|    | <b>Factor1</b> | <b>Factor2</b> | <b>Factor3</b> |
|----|----------------|----------------|----------------|
| C2 |                |                |                |
| C3 |                |                |                |
| C1 |                |                |                |

## Residual Section

| <b>Row</b> | <b>T2</b> | <b>T2 Prob</b> | <b>Q0</b> | <b>Q1</b> | <b>Q2</b> |
|------------|-----------|----------------|-----------|-----------|-----------|
| 1          | .59       | 0.9119         | 1.18      | 0.00      | 0.00      |
| 2          | 2.75      | 0.5079         | 3.25      | 0.01      | 0.00      |
| 3          | 6.45      | 0.1737         | 0.96      | 0.01      | 0.01*     |
| 4          | .83       | 0.8647         | 1.32      | 0.00      | 0.00      |
| 5          | 2.11      | 0.6127         | 2.81      | 0.01      | 0.00      |
| 6          | 2.36      | 0.5698         | 3.30      | 0.01      | 0.00      |
| 7          | 2.95      | 0.4790         | 6.26      | 0.01      | 0.00      |
| 8          | 1.41      | 0.7443         | 2.47      | 0.00      | 0.00      |
| 9          | 6.86      | 0.1548         | 0.79      | 0.09*     | 0.00      |
| 10         | 3.25      | 0.4391         | 5.00      | 0.01      | 0.00      |
| 11         | .39       | 0.9508         | 0.87      | 0.00      | 0.00      |
| 12         | 5.49      | 0.2278         | 8.97      | 0.04      | 0.00      |
| 13         | 1.88      | 0.6549         | 1.01      | 0.02      | 0.00      |
| 14         | .26       | 0.9718         | 0.60      | 0.00      | 0.00      |
| 15         | 1.09      | 0.8095         | 1.23      | 0.00      | 0.00      |
| 16         | 1.23      | 0.7812         | 1.52      | 0.01      | 0.00      |
| 17         | 3.92      | 0.3600         | 1.74      | 0.01      | 0.01      |
| 18         | 7.18      | 0.1417         | 7.71      | 0.07*     | 0.00      |

# Principal Components Report

Page/Date/Time 4 01-Dec-21 21:37:55  
Database

## Factor Score

| Row | Factor1 | Factor2 | Factor3 |
|-----|---------|---------|---------|
| 1   | 0.6273  | -0.4228 | -0.1459 |
| 2   | 1.0427  | 0.8120  | 1.0035  |
| 3   | -0.5650 | 0.0503  | 2.4746  |
| 4   | 0.6657  | -0.4053 | -0.4692 |
| 5   | 0.9689  | 0.5186  | 0.9493  |
| 6   | 1.0515  | 0.5928  | 0.9502  |
| 7   | -1.4483 | -0.7287 | 0.5700  |
| 8   | -0.9104 | -0.0727 | 0.7609  |
| 9   | -0.4844 | 2.3435  | -1.0634 |
| 10  | -1.2936 | -0.6292 | -1.0859 |
| 11  | 0.5393  | -0.2843 | -0.1214 |
| 12  | -1.7302 | -1.5788 | 0.0712  |
| 13  | 0.5743  | -1.2413 | -0.0672 |
| 14  | 0.4481  | 0.2427  | -0.0045 |
| 15  | 0.6413  | -0.3570 | -0.7453 |
| 16  | 0.7127  | -0.5190 | -0.6741 |
| 17  | 0.7614  | -0.3791 | -1.7881 |
| 18  | -1.6013 | 2.0583  | -0.6147 |

## Plots Section

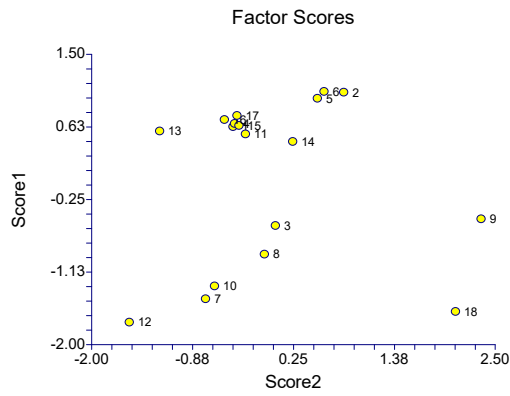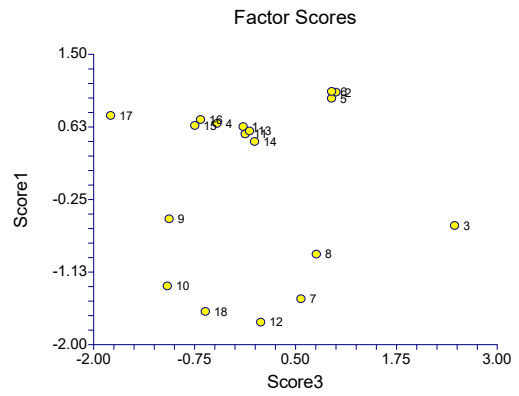

# Principal Components Report

Page/Date/Time 5 01-Dec-21 21:37:55  
Database

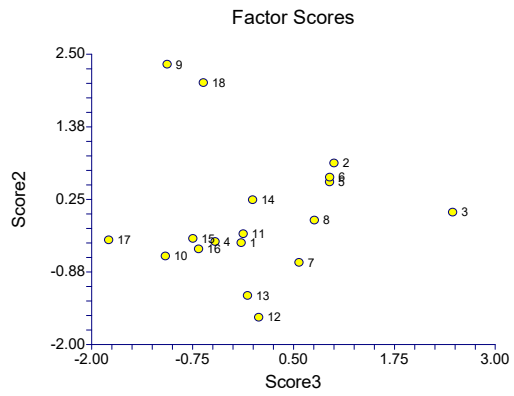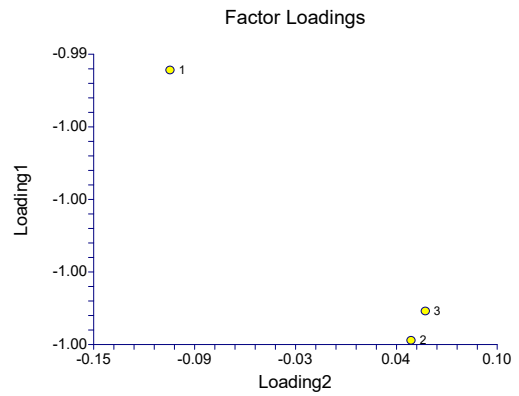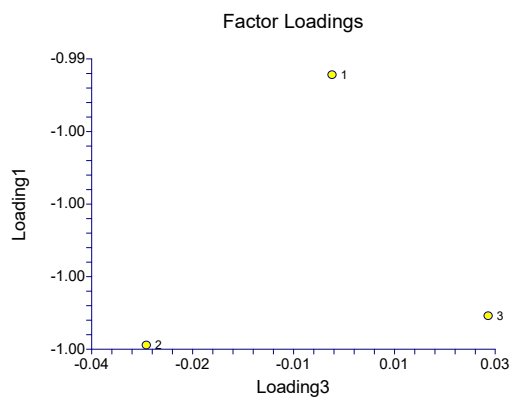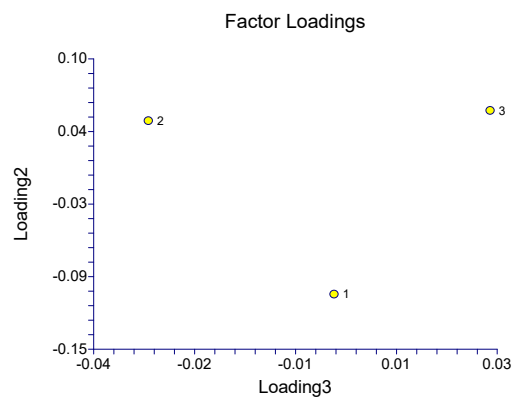

Supplement: s1 [file s1]
