# Supplementary material for: The Effects of a Meldonium Pre-Treatment on the Course of the LPS-Induced Sepsis in Rats
Source: MDPI journal article supplement (doi:10.3390/ijms23042395), 2022-02-21

## Principal Components Report

Page/Date/Time 1 01-Dec-21 21:10:57  
 Database D:\ONEDRIVE\LP5 LIPIDOMIKA\KLASTERNA JETRA.S0

### Descriptive Statistics Section

| Variables | Count | Mean     | Standard Deviation | Communality |
|-----------|-------|----------|--------------------|-------------|
| jetra_c   | 18    | 123.1307 | 119.3745           | 1.000000    |
| jetra_s   | 18    | 138.1656 | 124.9316           | 1.000000    |
| jetra_m_s | 18    | 159.904  | 151.8847           | 1.000000    |

### Correlation Section

| Variables | jetra_c  | jetra_s  | jetra_m_s |
|-----------|----------|----------|-----------|
| jetra_c   | 1.000000 | 0.985982 | 0.973163  |
| jetra_s   | 0.985982 | 1.000000 | 0.991668  |
| jetra_m_s | 0.973163 | 0.991668 | 1.000000  |

Phi=0.983635 Log(Det|R)=-7.726903 Bartlett Test=117.19 DF=3 Prob=0.000000

### Bar Chart of Absolute Correlation Section

| Variables | jetra_c | jetra_s | jetra_m_s |
|-----------|---------|---------|-----------|
| jetra_c   |         |         |           |
| jetra_s   |         |         |           |
| jetra_m_s |         |         |           |

Phi=0.983635 Log(Det|R)=-7.726903 Bartlett Test=117.19 DF=3 Prob=0.000000

### Eigenvalues

| No. | Eigenvalue | Individual Percent | Cumulative Percent | Scree Plot |
|-----|------------|--------------------|--------------------|------------|
| 1   | 2.967229   | 98.91              | 98.91              |            |
| 2   | 0.027337   | 0.91               | 99.82              |            |
| 3   | 0.005434   | 0.18               | 100.00             |            |

### Eigenvectors

| Variables | Factor1   | Factor2   | Factor3   |
|-----------|-----------|-----------|-----------|
| jetra_c   | -0.575770 | 0.761426  | 0.297857  |
| jetra_s   | -0.579385 | -0.122926 | -0.805731 |
| jetra_m_s | -0.576890 | -0.636490 | 0.511936  |

**Principal Components Report**

Page/Date/Time 2 01-Dec-21 21:10:57  
 Database D:\ONEDRIVE\LPS LIPIDOMIKA\KLASTERNA JETRA.S0

**Bar Chart of Absolute Eigenvectors**

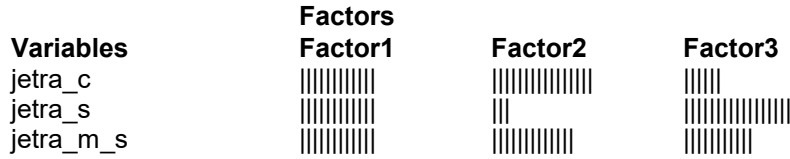

**Factor Loadings**

| Variables | Factor1   | Factor2   | Factor3   |
|-----------|-----------|-----------|-----------|
| jetra_c   | -0.991801 | 0.125893  | 0.021958  |
| jetra_s   | -0.998027 | -0.020324 | -0.059397 |
| jetra_m_s | -0.993731 | -0.105236 | 0.037739  |

**Bar Chart of Absolute Factor Loadings**

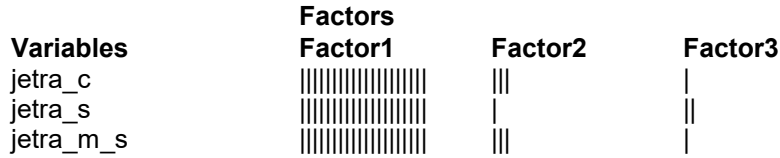

**Communalities**

| Variables | Factor1  | Factor2  | Factor3  | Communality |
|-----------|----------|----------|----------|-------------|
| jetra_c   | 0.983669 | 0.015849 | 0.000482 | 1.000000    |
| jetra_s   | 0.996059 | 0.000413 | 0.003528 | 1.000000    |
| jetra_m_s | 0.987501 | 0.011075 | 0.001424 | 1.000000    |

**Bar Chart of Communalities**

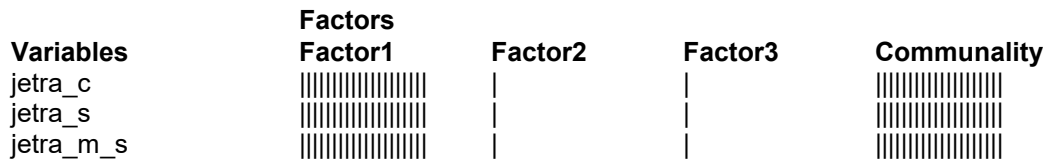

## Principal Components Report

Page/Date/Time 3 01-Dec-21 21:10:57  
Database D:\ONEDRIVE\LPS LIPIDOMIKA\KLASTERNA JETRA.S0

### Factor Structure Summary

|           | <b>Factor1</b> | <b>Factor2</b> | <b>Factor3</b> |
|-----------|----------------|----------------|----------------|
| jetra_s   |                |                |                |
| jetra_m_s |                |                |                |
| jetra_c   |                |                |                |

### Residual Section

| <b>Row</b> | <b>T2</b> | <b>T2 Prob</b> | <b>Q0</b> | <b>Q1</b> | <b>Q2</b> |
|------------|-----------|----------------|-----------|-----------|-----------|
| 1          | .11       | 0.9918         | 0.02      | 0.00      | 0.00      |
| 2          | .80       | 0.8702         | 2.29      | 0.00      | 0.00      |
| 3          | 7.90      | 0.1162         | 2.43      | 0.15*     | 0.01      |
| 4          | .81       | 0.8690         | 1.12      | 0.01      | 0.00      |
| 5          | .77       | 0.8773         | 2.25      | 0.00      | 0.00      |
| 6          | 1.16      | 0.7952         | 2.66      | 0.00      | 0.00      |
| 7          | 8.18      | 0.1080         | 14.10     | 0.02      | 0.02      |
| 8          | .43       | 0.9437         | 1.10      | 0.00      | 0.00      |
| 9          | 3.14      | 0.4534         | 0.72      | 0.03      | 0.01      |
| 10         | 11.12     | 0.0507         | 7.82      | 0.08      | 0.04*     |
| 11         | .74       | 0.8821         | 1.08      | 0.00      | 0.00      |
| 12         | 1.36      | 0.7556         | 2.34      | 0.01      | 0.00      |
| 13         | .77       | 0.8764         | 1.53      | 0.00      | 0.00      |
| 14         | .80       | 0.8696         | 1.03      | 0.01      | 0.00      |
| 15         | .72       | 0.8862         | 2.09      | 0.00      | 0.00      |
| 16         | .87       | 0.8557         | 2.51      | 0.00      | 0.00      |
| 17         | .75       | 0.8809         | 2.16      | 0.00      | 0.00      |
| 18         | 10.57     | 0.0582         | 3.76      | 0.24*     | 0.00      |

# Principal Components Report

Page/Date/Time 4 01-Dec-21 21:10:57  
Database D:\ONEDRIVE\LPS LIPIDOMIKA\KLASTERNA JETRA.S0

## Factor Score

| Row | Factor1 | Factor2 | Factor3 |
|-----|---------|---------|---------|
| 1   | -0.0870 | 0.2842  | 0.1474  |
| 2   | 0.8776  | -0.0561 | 0.1652  |
| 3   | -0.8751 | 2.2969  | 1.3647  |
| 4   | 0.6111  | 0.5667  | 0.3346  |
| 5   | 0.8711  | 0.0842  | 0.0132  |
| 6   | 0.9463  | 0.2335  | 0.4621  |
| 7   | -2.1782 | 0.1745  | 1.8448  |
| 8   | -0.6085 | -0.2362 | 0.0009  |
| 9   | -0.4829 | -0.7868 | -1.5124 |
| 10  | -1.6156 | 1.1907  | -2.6637 |
| 11  | 0.6006  | 0.3651  | 0.4987  |
| 12  | -0.8865 | -0.4006 | -0.6407 |
| 13  | 0.7165  | -0.1833 | -0.4726 |
| 14  | 0.5881  | -0.3595 | -0.5734 |
| 15  | 0.8395  | -0.1332 | 0.0067  |
| 16  | 0.9194  | -0.1581 | 0.0278  |
| 17  | 0.8530  | 0.0562  | 0.1323  |
| 18  | -1.0895 | -2.9380 | 0.8644  |

## Plots Section

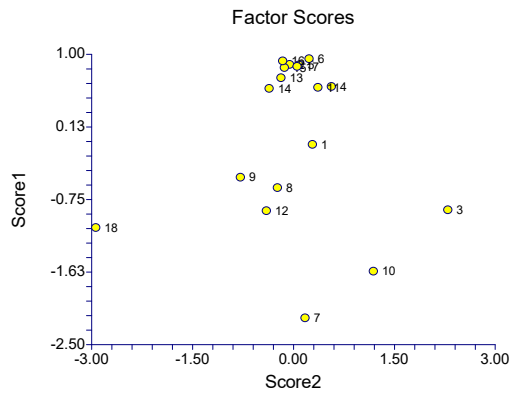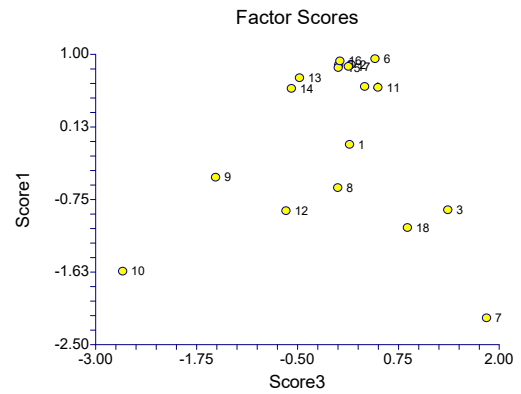

# Principal Components Report

Page/Date/Time  
Database

5 01-Dec-21 21:10:57  
D:\ONEDRIVE\LP5 LIPIDOMIKA\KLASTERNA JETRA.S0

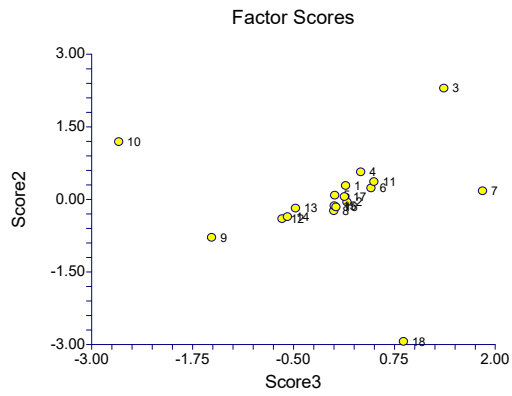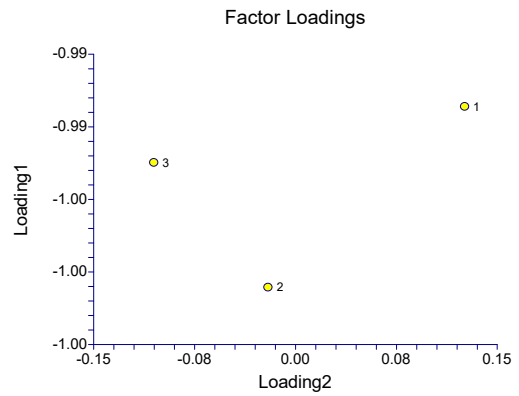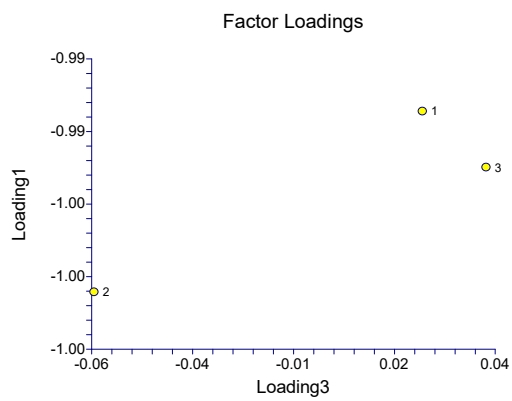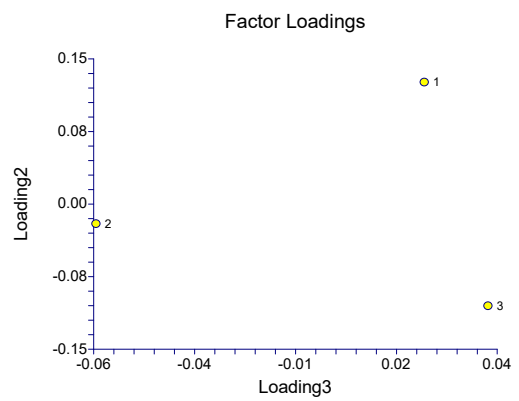

Supplement: s1 [file s1]
